# Supplementary material for: Distinct fluorescence state, mechanofluorochromism of terpyridine conjugated fluorophores and the reusable sensing of nitroaromatics in aqueous medium
Source: Royal Society of Chemistry journal article supplement (doi:10.1039/d3nj01235b), 2023-01-01
Supplement: d3nj01235b1.pdf [file d3nj01235b1.pdf]

## Electronic Supplementary Information (ESI)

### Distinct fluorescence state, mechanofluorochromism of terpyridine conjugated fluorophores and the reusable sensing of nitroaromatics in aqueous medium

#### 1. Experimental Section

##### Synthesis of 4-(2,6-di(pyridin-2-yl)pyridin-4-yl)-N,N-diphenylbenzenamine (TPA-TP)

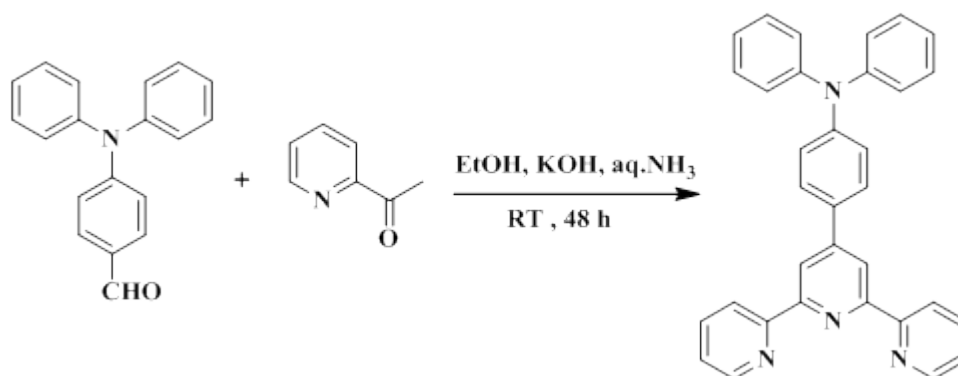

Scheme 1. Synthesis of TPA-TP.

##### Synthesis of 2,6-di(pyridin-3-yl)-4-(4-(1,2,2-triphenylvinyl)phenyl)pyridine (TPE-TP)

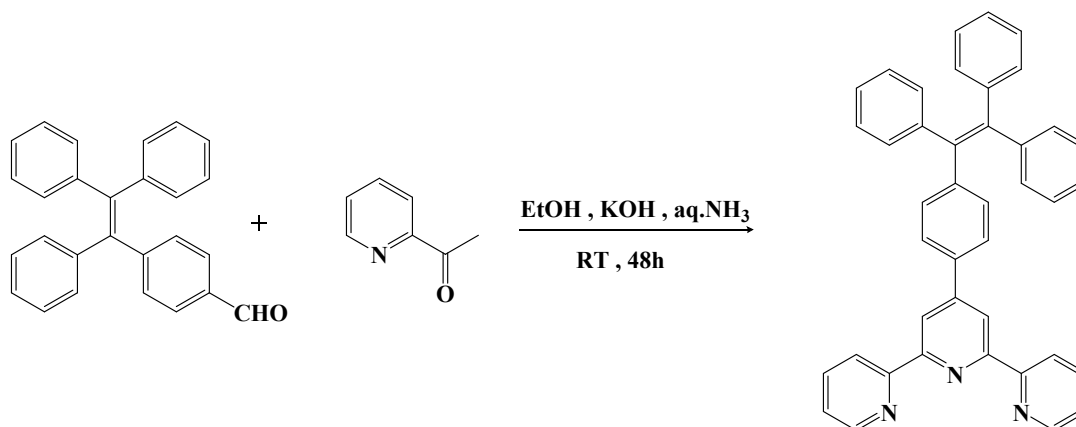

Scheme 2 Synthesis of TPE-TP.

##### Synthesis of 2-(4-(pyren-1-yl)-6-(pyridin-2-yl)pyridin-2-yl)pyridine (PY-TP)

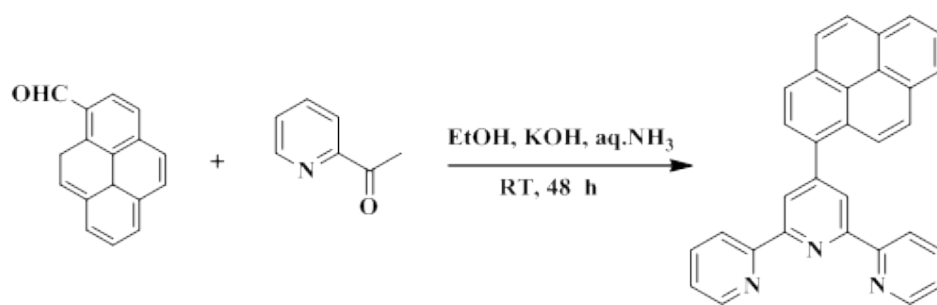

**Scheme 3** .Synthesis of PY-TP.

## 2. FT-IR analysis

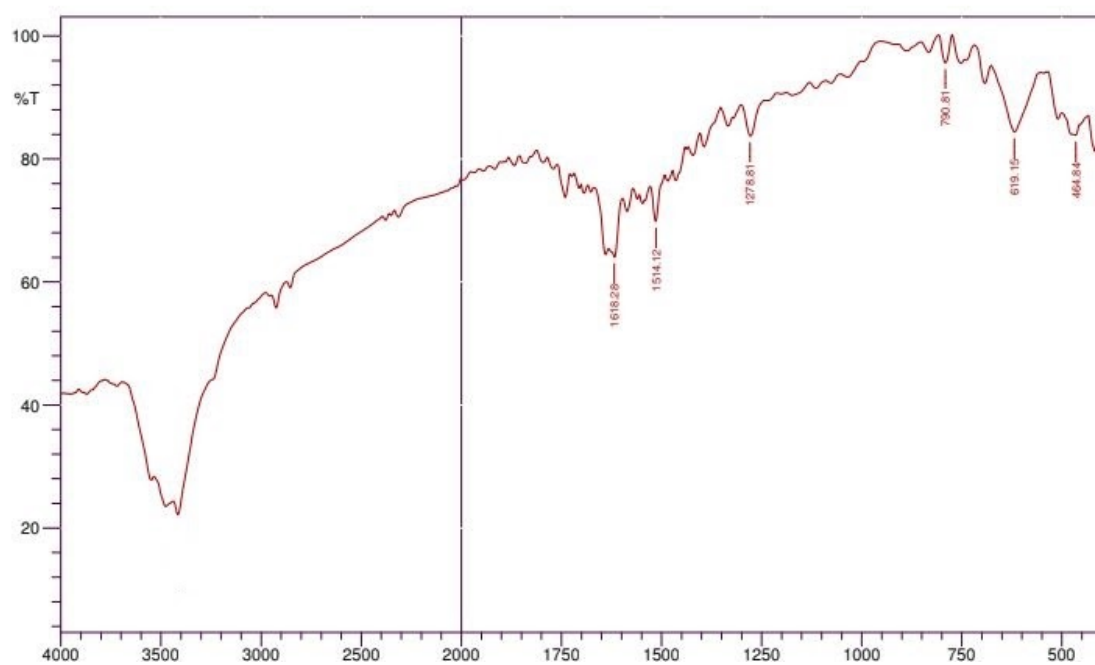

**Fig. S1** FT-IR spectra of TPA-TP.

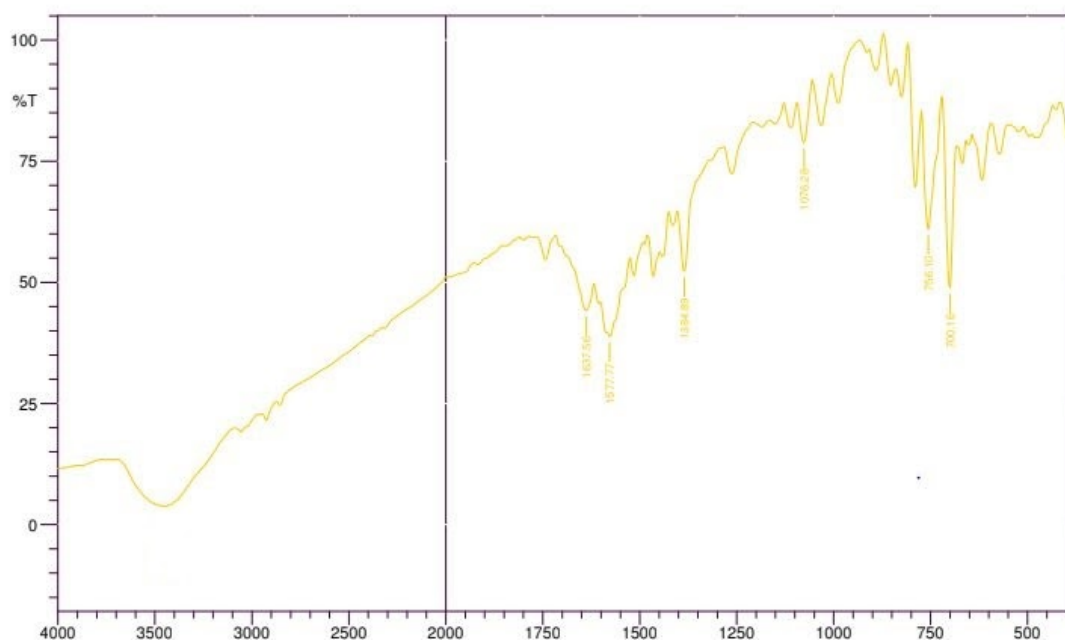

**Fig. S2** FT-IR spectra of TPE-TP.

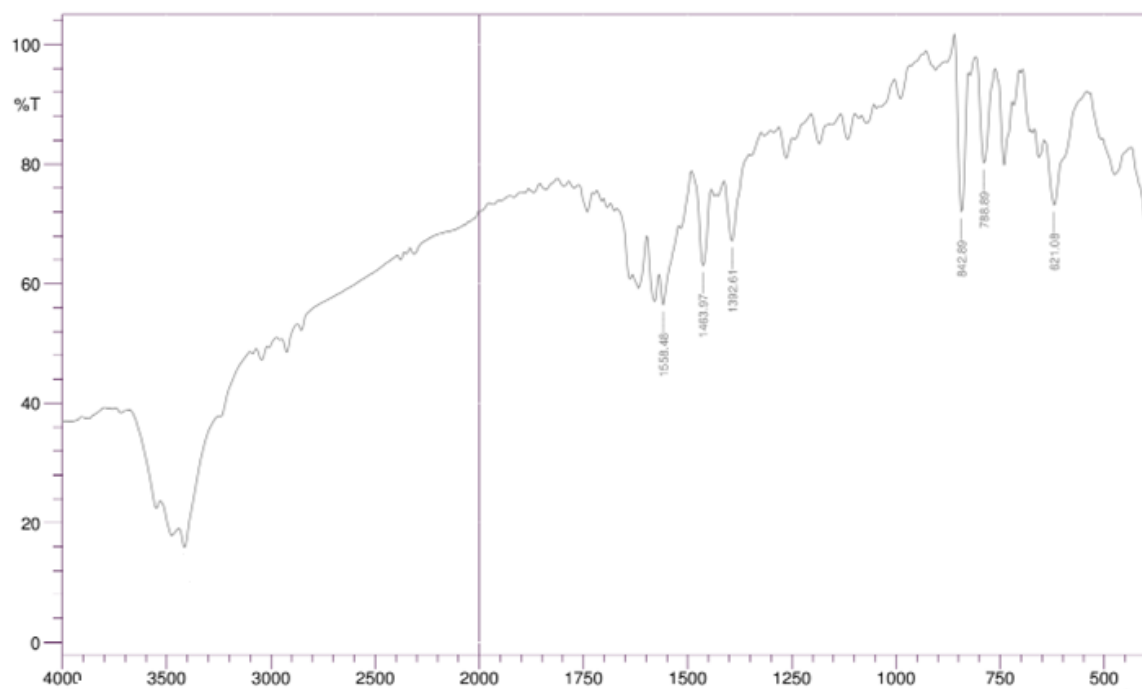

**Fig. S3** FT-IR spectra of PY-TP.

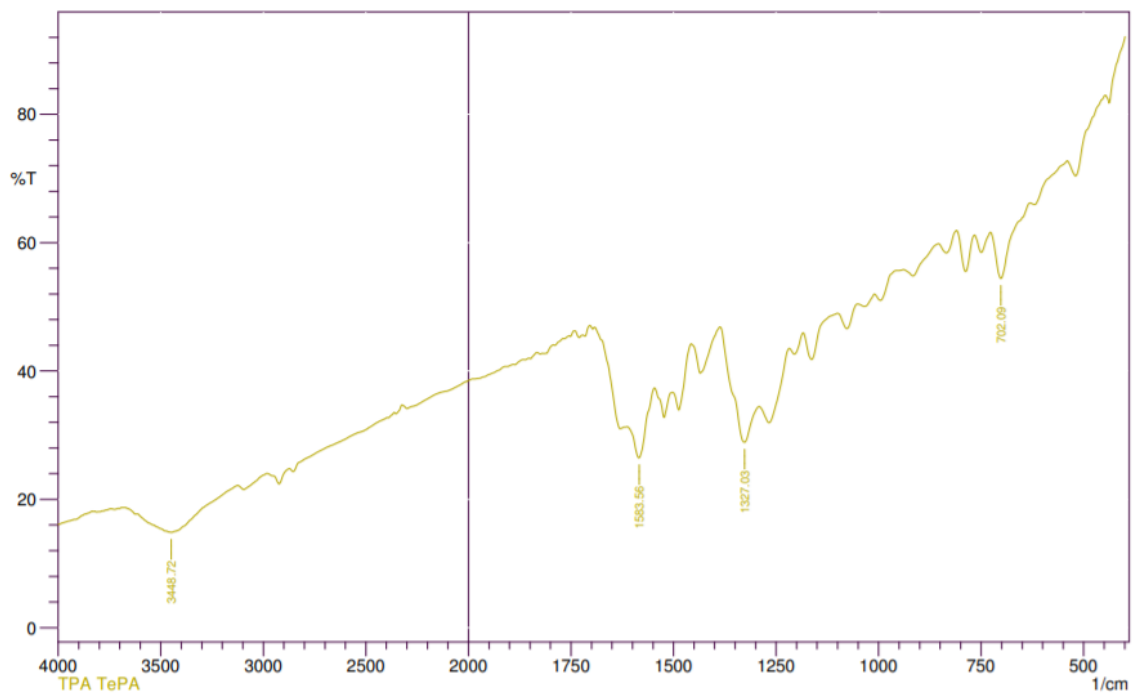

**Fig. S4** FT-IR spectra of TPA-TP.PA

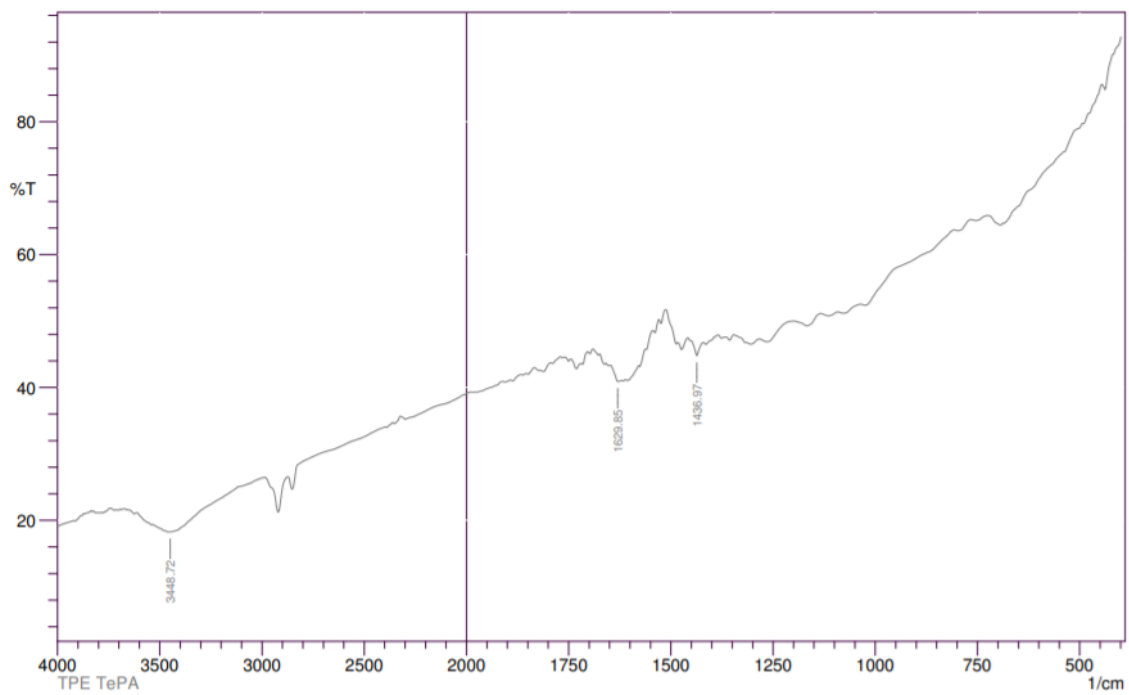

**Fig. S5** FT-IR spectra of TPE-TP.PA

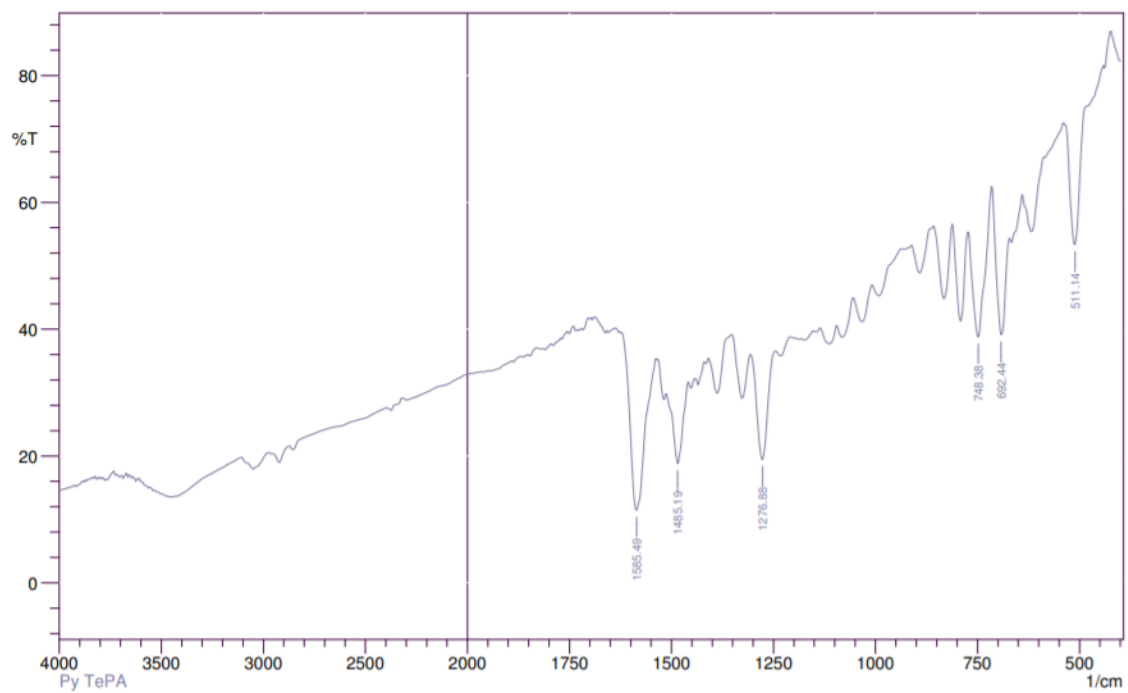

**Fig. S6** FT-IR spectra of PY-TP.PA

### 3. NMR studies

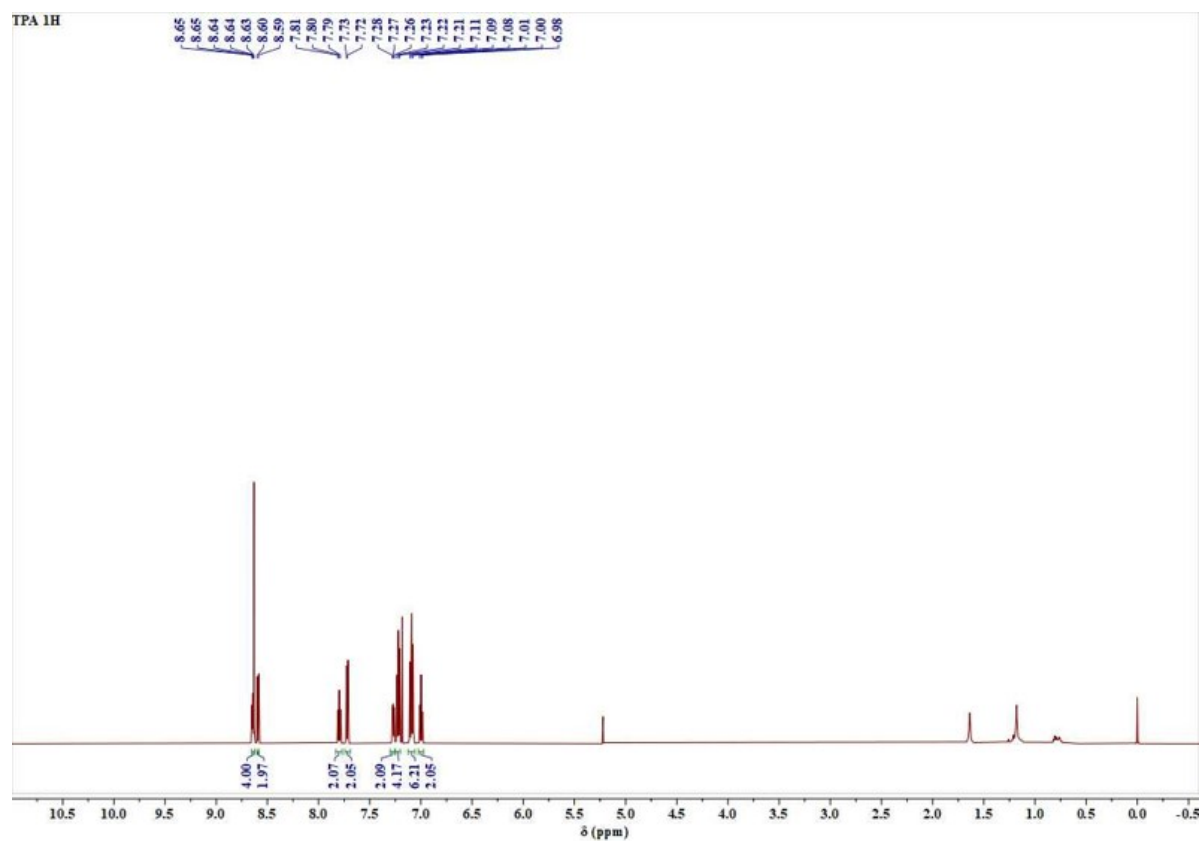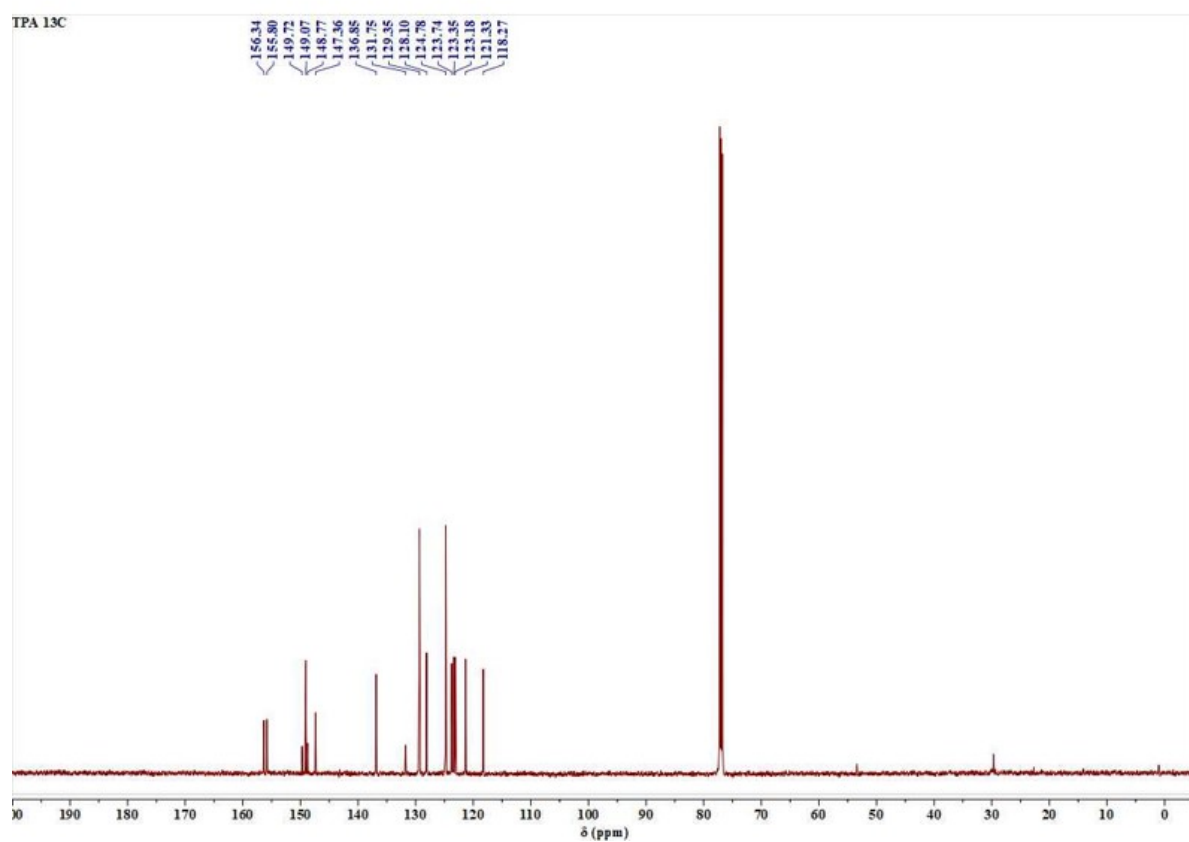

Fig. S7.  $^1\text{H}$  &  $^{13}\text{C}$  NMR spectrum of TPA-TP.

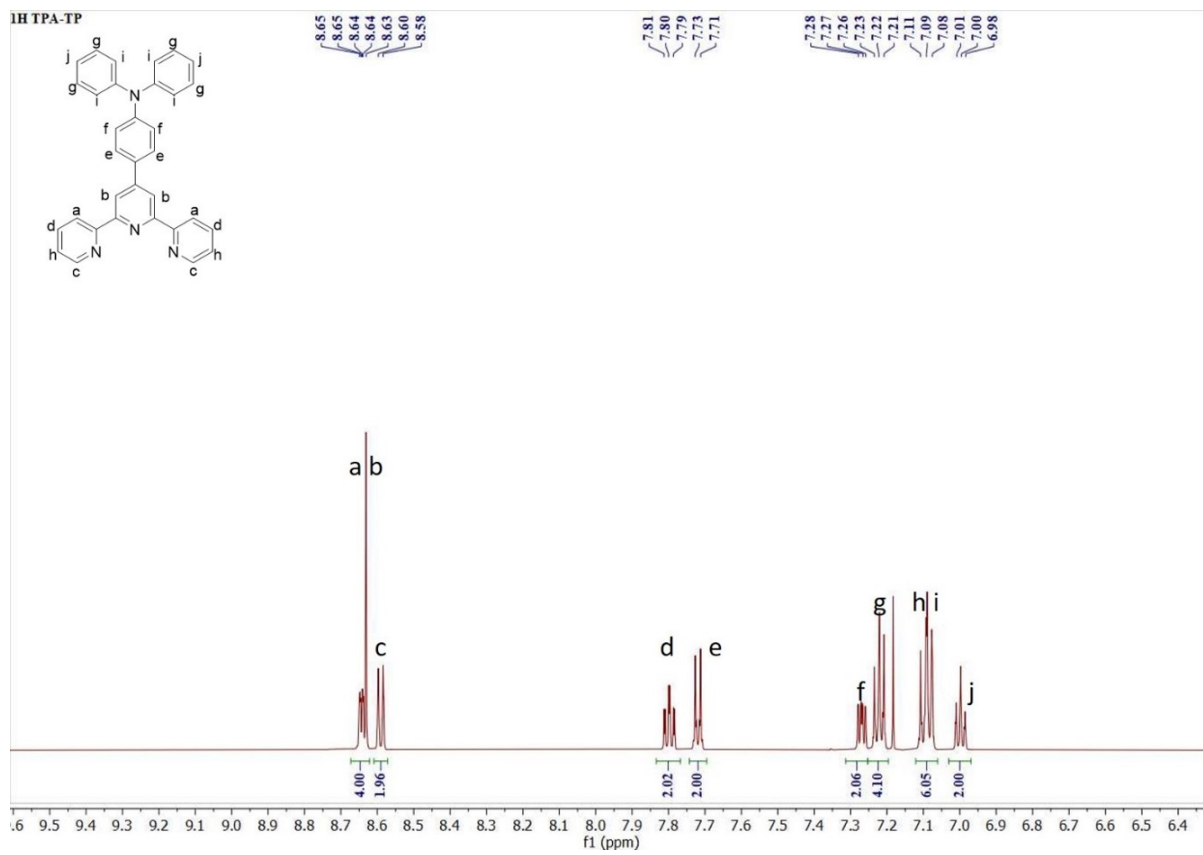

The expanded <sup>1</sup>H NMR spectrum of TPA-TP along with peak assigning.

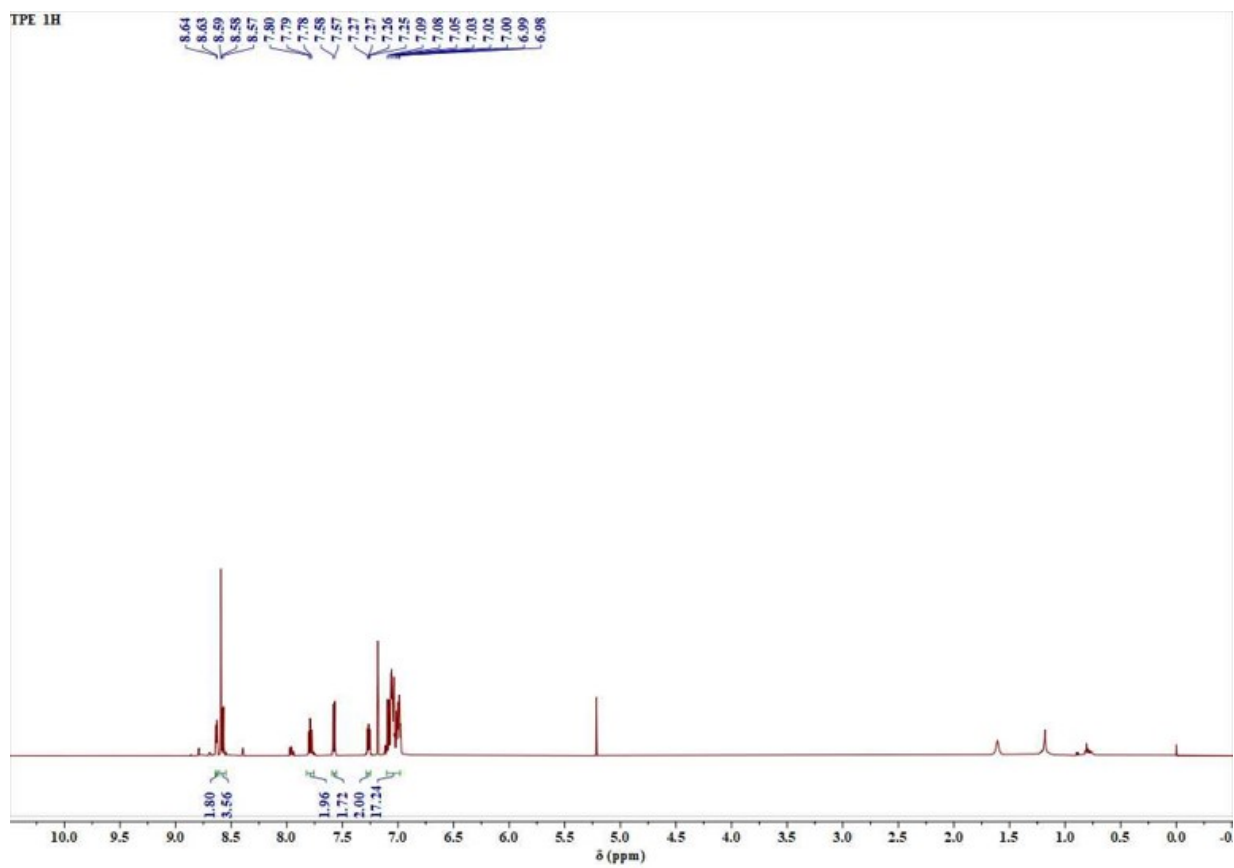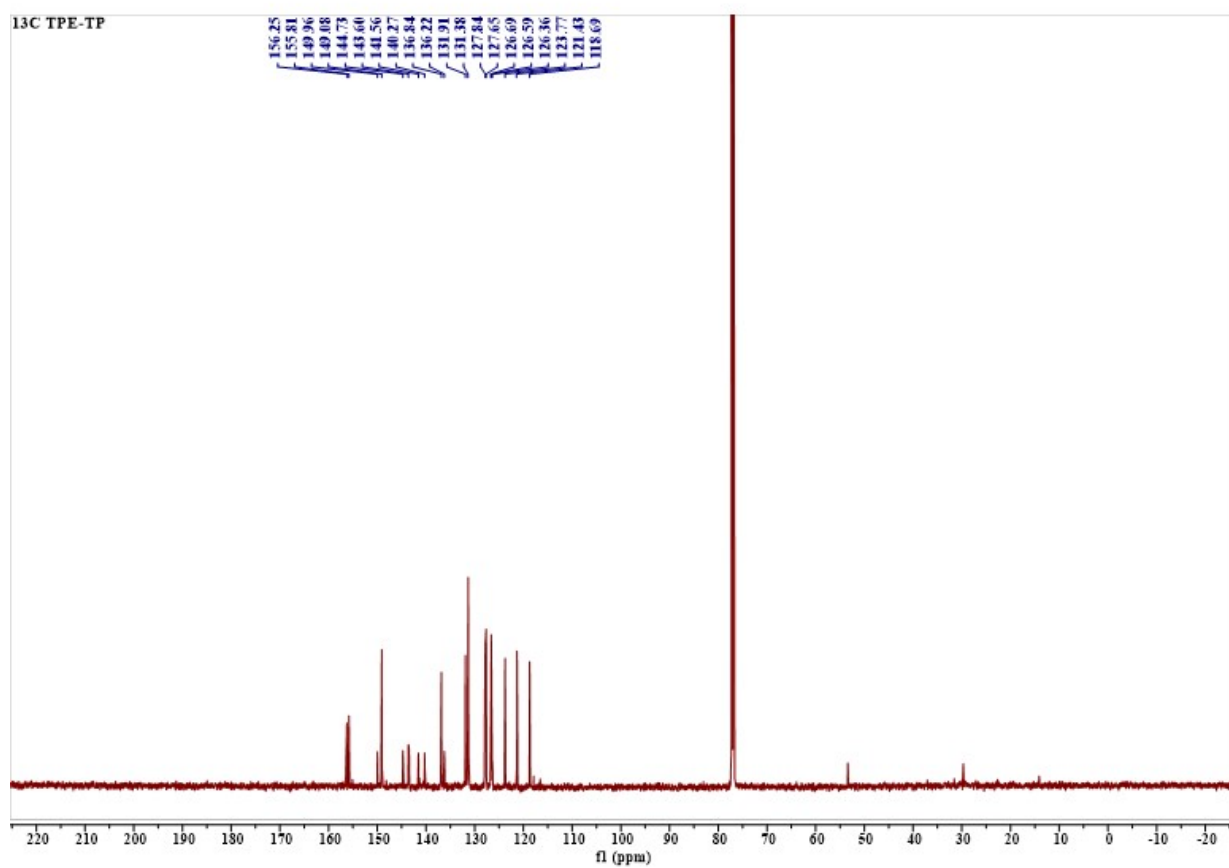

**Fig. S8.**  $^1\text{H}$  &  $^{13}\text{C}$  NMR spectrum of TPE-TP.



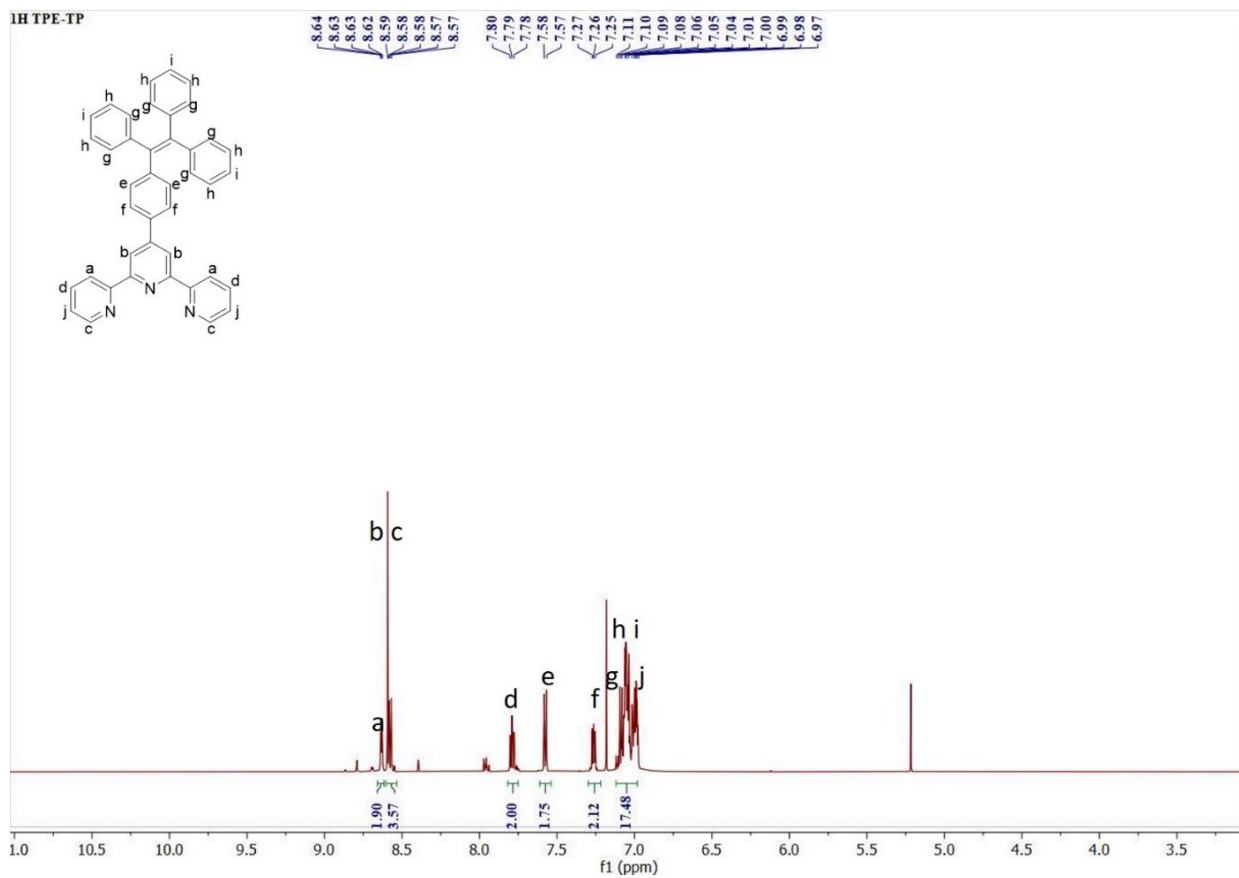

The expanded <sup>1</sup>H NMR spectrum of TPE-TP along with peak assigning.

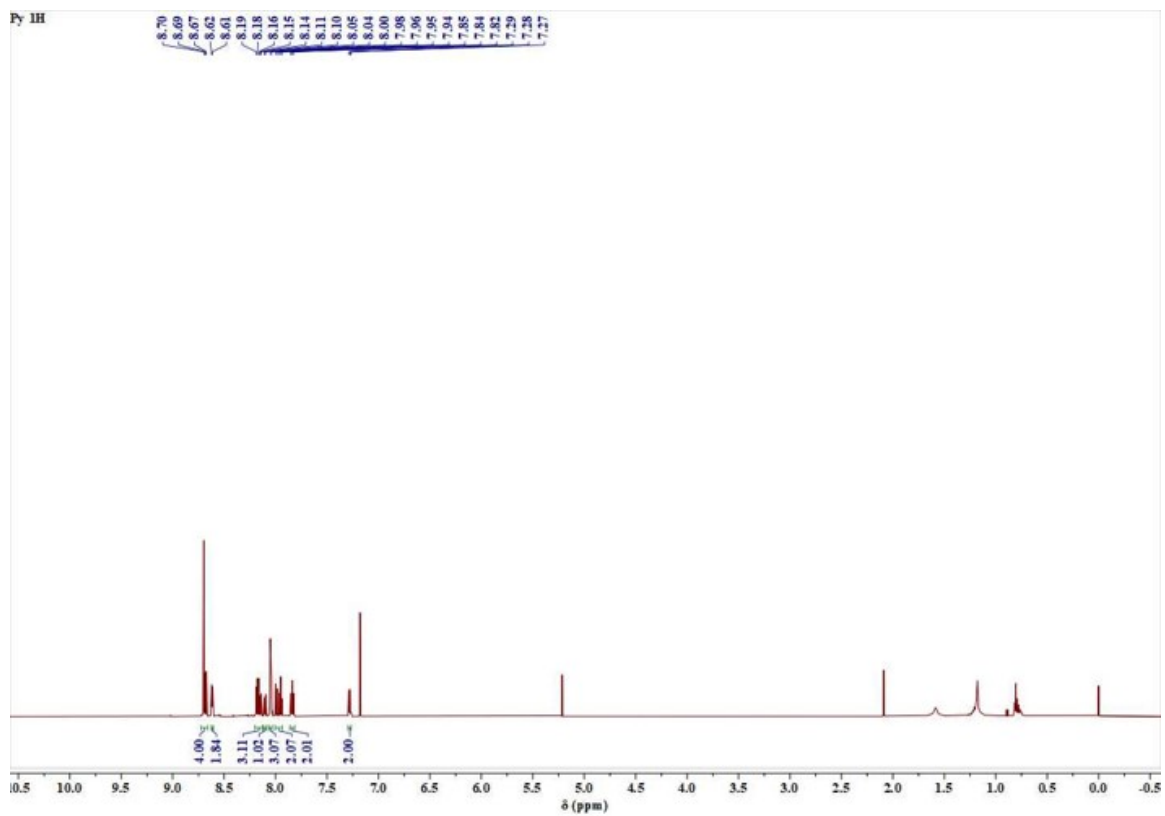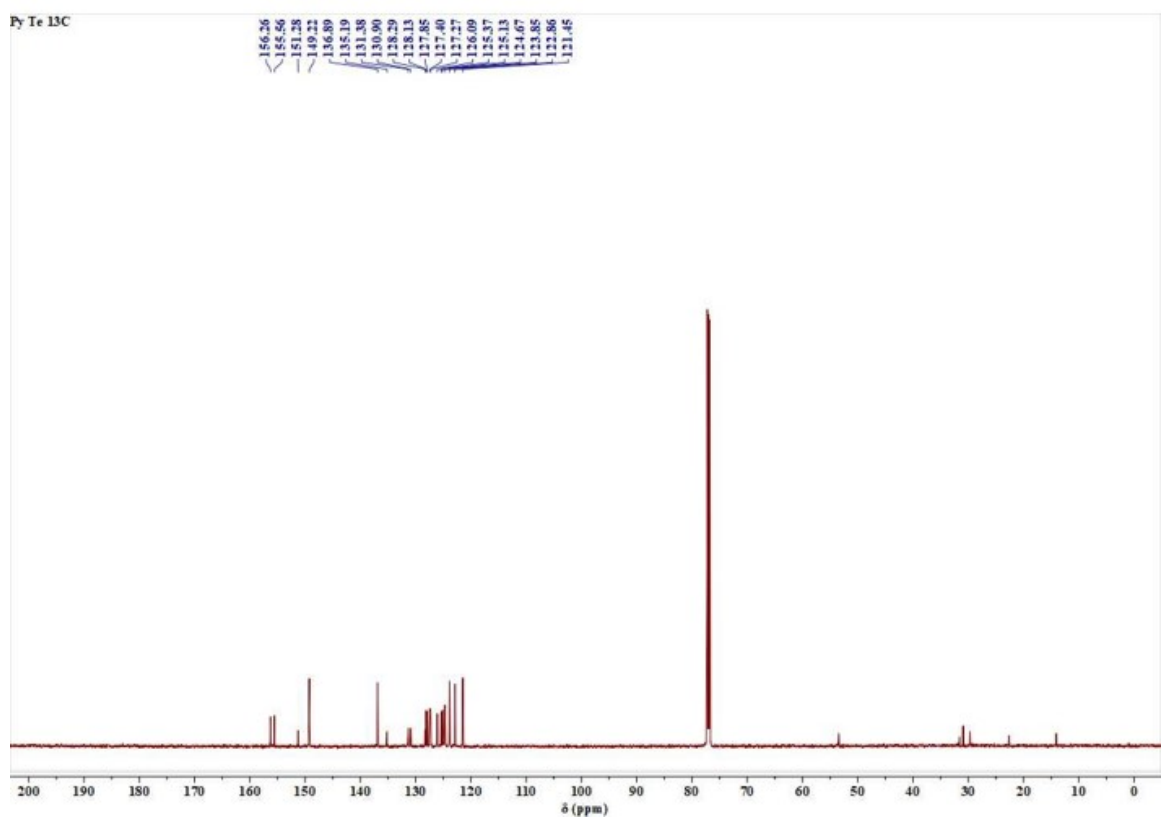

Fig. S9.  $^1\text{H}$  &  $^{13}\text{C}$  NMR spectrum of Py-TP

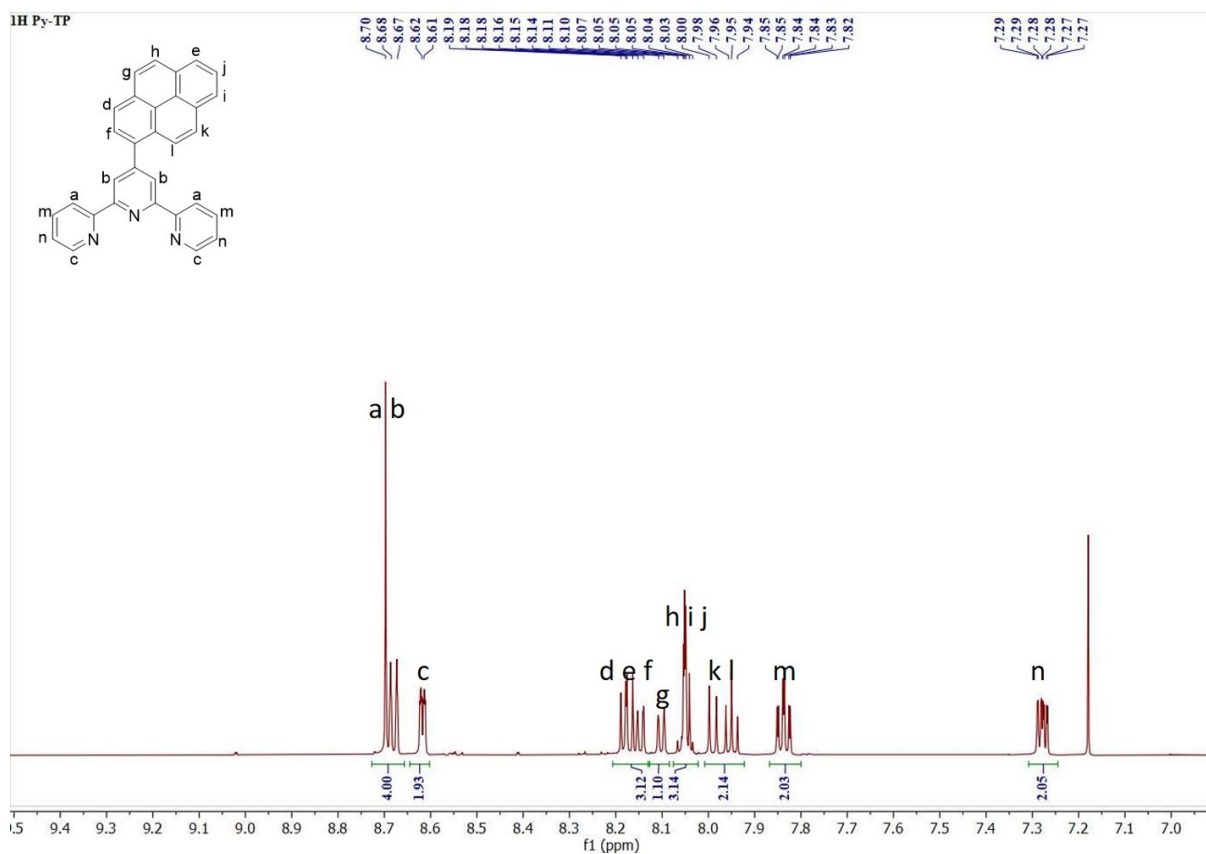

The expanded <sup>1</sup>H NMR spectrum of Py-TP along with peak assigning.

## 4. Mass analysis

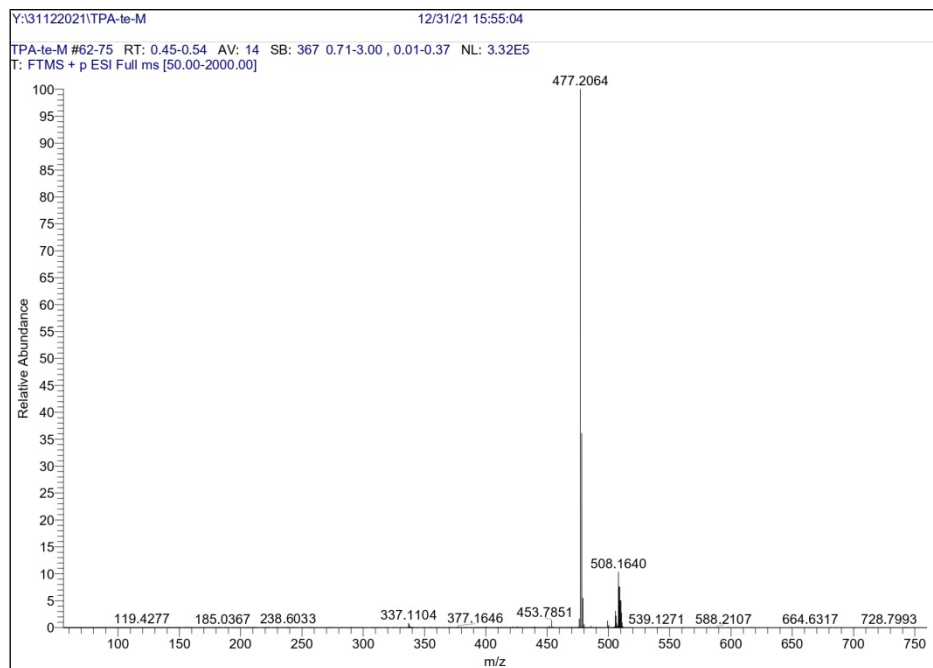

Fig. S10 Mass spectrum of TPA-TP

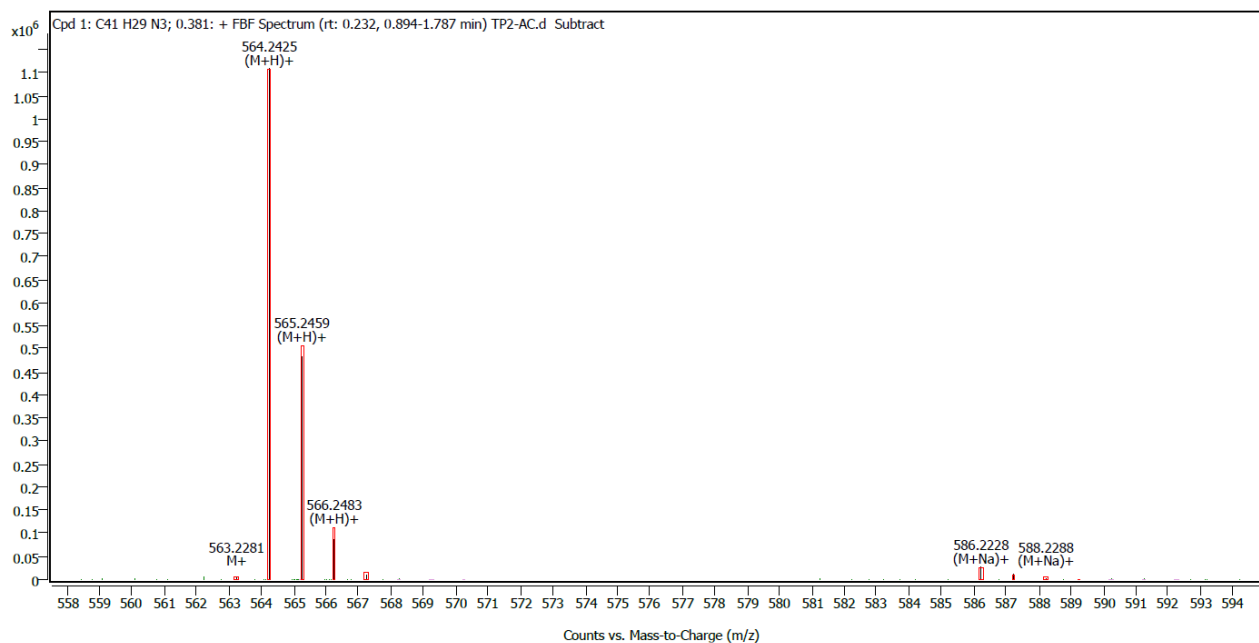

Fig. S11 Mass spectrum of TPE-TP

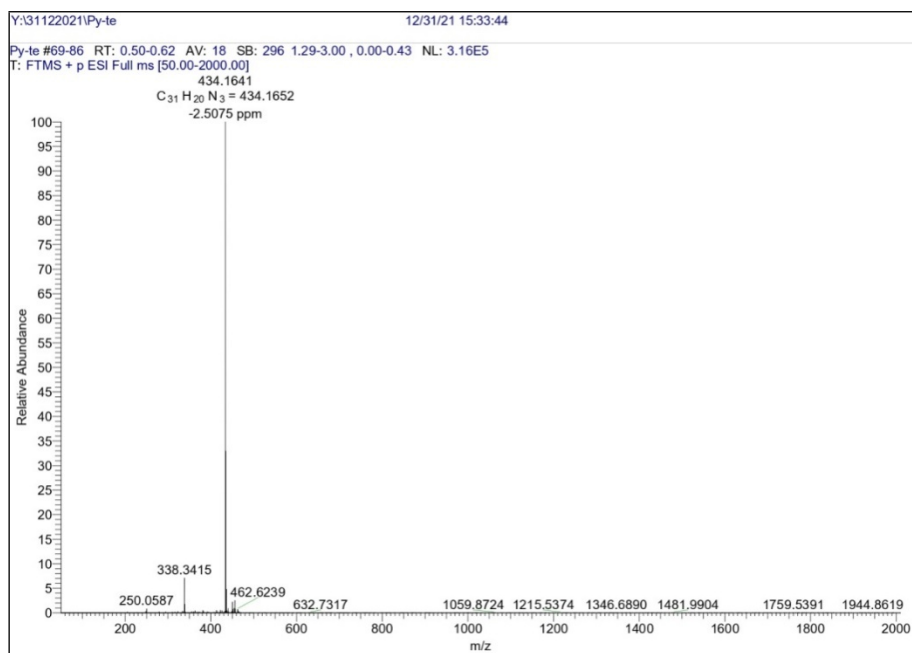

**Fig. S12** Mass spectrum of PY-TP

## 5. Photophysical studies

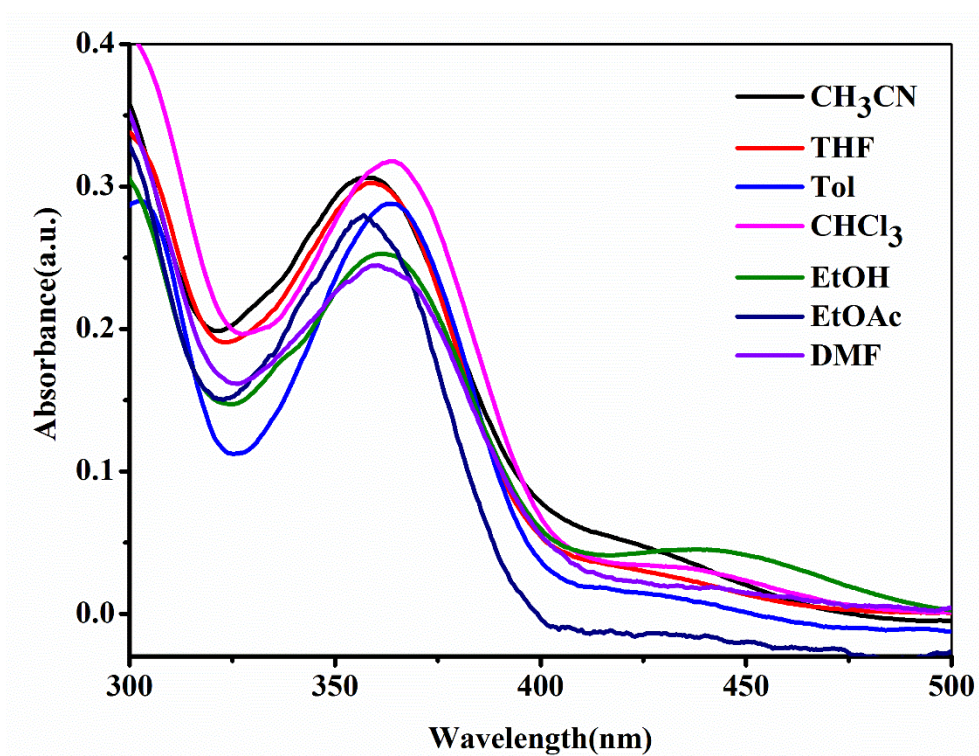

Fig. S13 Absorption spectrum of TPA-TP in different solvent

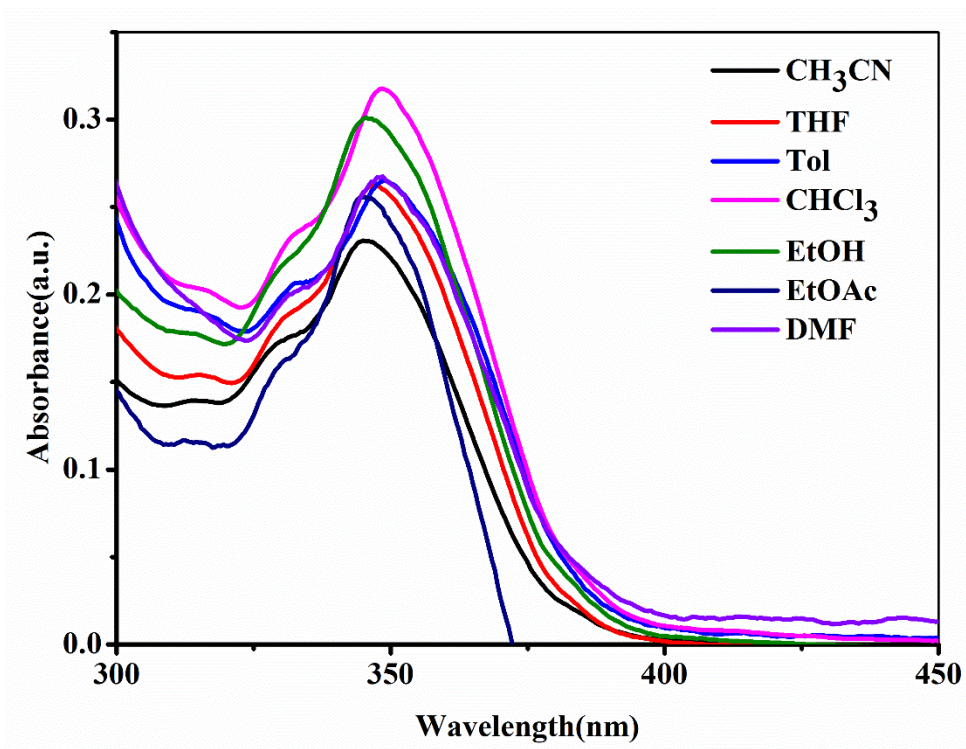

Fig. S14 Absorption spectrum of Py-TP in different solvent

**Table S1.** The absorbance data for **TPA-TP** in the different solvents

| Solvent            | Dielectric constant | $\lambda_{\max 1}$ (nm) |
|--------------------|---------------------|-------------------------|
| Toluene            | 2.39                | 363                     |
| CHCl <sub>3</sub>  | 4.81                | 364                     |
| EtOAc              | 6.02                | 356                     |
| THF                | 7.58                | 358                     |
| EtOH               | 24.3                | 361                     |
| CH <sub>3</sub> CN | 36.5                | 356                     |
| DMF                | 36.7                | 359                     |

**Table S2.** The absorbance data for **Py-TP** in the different solvents

| Solvent            | Dielectric constant | $\lambda_{\max}$ (nm) |
|--------------------|---------------------|-----------------------|
| Toluene            | 2.39                | 348                   |
| CHCl <sub>3</sub>  | 4.81                | 348                   |
| EtOAc              | 6.02                | 344                   |
| THF                | 7.58                | 347                   |
| EtOH               | 24.3                | 345                   |
| CH <sub>3</sub> CN | 36.5                | 345                   |
| DMF                | 36.7                | 348                   |

**Table S3.** The emission data for **TPA-TP** in the different solvents. Quantum yield is compared to quinine sulphate standard.

| Solvent            | Dielectric constant | $\lambda_{\max}$ (nm) | Quantum yield |
|--------------------|---------------------|-----------------------|---------------|
| Toluene            | 2.39                | 426                   | 0.30          |
| CHCl <sub>3</sub>  | 4.81                | 451                   | 0.22          |
| EtOAc              | 6.02                | 452                   | 0.30          |
| THF                | 7.58                | 451                   | 0.16          |
| EtOH               | 24.3                | 491                   | 0.05          |
| CH <sub>3</sub> CN | 36.5                | 489                   | 0.08          |
| DMF                | 36.7                | 484                   | 0.18          |

**Table S4.** The data of emission for the compound **Py-TP** in the different solvents. Quantum yield is compared to quinine sulphate standard.

| Solvent            | Dielectric constant | $\lambda_{\text{max1}}$ (nm) | Quantum yield |
|--------------------|---------------------|------------------------------|---------------|
| Toluene            | 2.39                | 402                          | 0.30          |
| CHCl <sub>3</sub>  | 4.81                | 413                          | 0.36          |
| EtOAc              | 6.02                | 409                          | 0.34          |
| THF                | 7.58                | 409                          | 0.19          |
| EtOH               | 24.3                | 430                          | 0.20          |
| CH <sub>3</sub> CN | 36.5                | 420                          | 0.28          |
| DMF                | 36.7                | 421                          | 0.24          |



## 6. Single crystal X-ray crystallography studies

**Table S5.** Crystal data and structure refinement for TPA-TP (CCDC: 2173855)

|                                   |                                                |          |
|-----------------------------------|------------------------------------------------|----------|
| Identification code               | SPA698                                         |          |
| Empirical formula                 | C <sub>33</sub> H <sub>24</sub> N <sub>4</sub> |          |
| Formula weight                    | 476.56                                         |          |
| Temperature                       | 220(2) K                                       |          |
| Wavelength                        | 0.630 Å                                        |          |
| Crystal system                    | Orthorhombic                                   |          |
| Space group                       | P2 <sub>1</sub> 2 <sub>1</sub> 2 <sub>1</sub>  |          |
| Unit cell dimensions              | a = 9.1150(18) Å                               | α = 90°. |
|                                   | b = 9.1470(18) Å                               | β = 90°. |
|                                   | c = 29.340(6) Å                                | γ = 90°. |
| Volume                            | 2446.2(8) Å <sup>3</sup>                       |          |
| Z                                 | 4                                              |          |
| Density (calculated)              | 1.294 Mg/m <sup>3</sup>                        |          |
| Absorption coefficient            | 0.061 mm <sup>-1</sup>                         |          |
| F(000)                            | 1000                                           |          |
| Crystal size                      | 0.041 x 0.021 x 0.008 mm <sup>3</sup>          |          |
| Theta range for data collection   | 2.067 to 24.998°.                              |          |
| Index ranges                      | -12 ≤ h ≤ 12, -12 ≤ k ≤ 12, -39 ≤ l ≤ 39       |          |
| Reflections collected             | 22108                                          |          |
| Independent reflections           | 6030 [R(int) = 0.1143]                         |          |
| Completeness to theta = 22.210°   | 98.0 %                                         |          |
| Absorption correction             | Empirical                                      |          |
| Max. and min. transmission        | 1.000 and 0.905                                |          |
| Refinement method                 | Full-matrix least-squares on F <sup>2</sup>    |          |
| Data / restraints / parameters    | 6030 / 0 / 336                                 |          |
| Goodness-of-fit on F <sup>2</sup> | 0.827                                          |          |
| Final R indices [I > 2σ(I)]       | R1 = 0.0507, wR2 = 0.0912                      |          |
| R indices (all data)              | R1 = 0.1215, wR2 = 0.1085                      |          |
| Absolute structure parameter      | 0(5)                                           |          |
| Extinction coefficient            | 0.0165(14)                                     |          |
| Largest diff. peak and hole       | 0.189 and -0.174 e.Å <sup>-3</sup>             |          |

**Table S6.** Crystal data and structure refinement for **TPE-TP** (CCDC: 2173857)

|                                   |                                                |                 |
|-----------------------------------|------------------------------------------------|-----------------|
| Identification code               | SPA681                                         |                 |
| Empirical formula                 | C <sub>41</sub> H <sub>29</sub> N <sub>3</sub> |                 |
| Formula weight                    | 563.67                                         |                 |
| Temperature                       | 220(2) K                                       |                 |
| Wavelength                        | 0.630 Å                                        |                 |
| Crystal system                    | Triclinic                                      |                 |
| Space group                       | P-1                                            |                 |
| Unit cell dimensions              | a = 10.174(2) Å                                | α = 100.57(3)°. |
|                                   | b = 12.366(3) Å                                | β = 108.39(3)°. |
|                                   | c = 12.944(3) Å                                | γ = 92.60(3)°.  |
| Volume                            | 1509.8(6) Å <sup>3</sup>                       |                 |
| Z                                 | 2                                              |                 |
| Density (calculated)              | 1.240 Mg/m <sup>3</sup>                        |                 |
| Absorption coefficient            | 0.057 mm <sup>-1</sup>                         |                 |
| F(000)                            | 592                                            |                 |
| Crystal size                      | 0.155 x 0.128 x 0.105 mm <sup>3</sup>          |                 |
| Theta range for data collection   | 1.494 to 24.999°.                              |                 |
| Index ranges                      | -13 ≤ h ≤ 13, -16 ≤ k ≤ 16, -17 ≤ l ≤ 17       |                 |
| Reflections collected             | 14387                                          |                 |
| Independent reflections           | 7229 [R(int) = 0.0127]                         |                 |
| Completeness to theta = 22.210°   | 95.7 %                                         |                 |
| Absorption correction             | Empirical                                      |                 |
| Max. and min. transmission        | 1.000 and 0.946                                |                 |
| Refinement method                 | Full-matrix least-squares on F <sup>2</sup>    |                 |
| Data / restraints / parameters    | 7229 / 0 / 397                                 |                 |
| Goodness-of-fit on F <sup>2</sup> | 1.078                                          |                 |
| Final R indices [I > 2σ(I)]       | R1 = 0.0495, wR2 = 0.1485                      |                 |
| R indices (all data)              | R1 = 0.0541, wR2 = 0.1526                      |                 |
| Extinction coefficient            | n/a                                            |                 |
| Largest diff. peak and hole       | 0.308 and -0.312 e.Å <sup>-3</sup>             |                 |

**Table S7.** Crystal data and structure refinement for **TPA-TP-PA** (CCDC: 2180021)

|                                   |                                                               |                |
|-----------------------------------|---------------------------------------------------------------|----------------|
| Identification code               | SPA726                                                        |                |
| Empirical formula                 | C <sub>39</sub> H <sub>27</sub> N <sub>7</sub> O <sub>7</sub> |                |
| Formula weight                    | 704.66                                                        |                |
| Temperature                       | 220(2) K                                                      |                |
| Wavelength                        | 0.700 Å                                                       |                |
| Crystal system                    | Monoclinic                                                    |                |
| Space group                       | P2 <sub>1</sub> /c                                            |                |
| Unit cell dimensions              | a = 25.421(5) Å                                               | a = 90°.       |
|                                   | b = 7.0150(14) Å                                              | b = 96.02(3)°. |
|                                   | c = 19.406(4) Å                                               | g = 90°.       |
| Volume                            | 3441.5(12) Å <sup>3</sup>                                     |                |
| Z                                 | 4                                                             |                |
| Density (calculated)              | 1.404 Mg/m <sup>3</sup>                                       |                |
| Absorption coefficient            | 0.105 mm <sup>-1</sup>                                        |                |
| F(000)                            | 1504                                                          |                |
| Crystal size                      | 0.094 x 0.018 x 0.015 mm <sup>3</sup>                         |                |
| Theta range for data collection   | 1.587 to 24.999°.                                             |                |
| Index ranges                      | -30 ≤ h ≤ 30, -8 ≤ k ≤ 8, -23 ≤ l ≤ 23                        |                |
| Reflections collected             | 22724                                                         |                |
| Independent reflections           | 6204 [R(int) = 0.0556]                                        |                |
| Completeness to theta = 24.835°   | 97.7 %                                                        |                |
| Absorption correction             | Empirical                                                     |                |
| Max. and min. transmission        | 1.000 and 0.848                                               |                |
| Refinement method                 | Full-matrix least-squares on F <sup>2</sup>                   |                |
| Data / restraints / parameters    | 6204 / 343 / 742                                              |                |
| Goodness-of-fit on F <sup>2</sup> | 1.360                                                         |                |
| Final R indices [I > 2σ(I)]       | R1 = 0.1155, wR2 = 0.3327                                     |                |
| R indices (all data)              | R1 = 0.1532, wR2 = 0.3620                                     |                |
| Extinction coefficient            | n/a                                                           |                |
| Largest diff. peak and hole       | 1.549 and -0.656 e.Å <sup>-3</sup>                            |                |

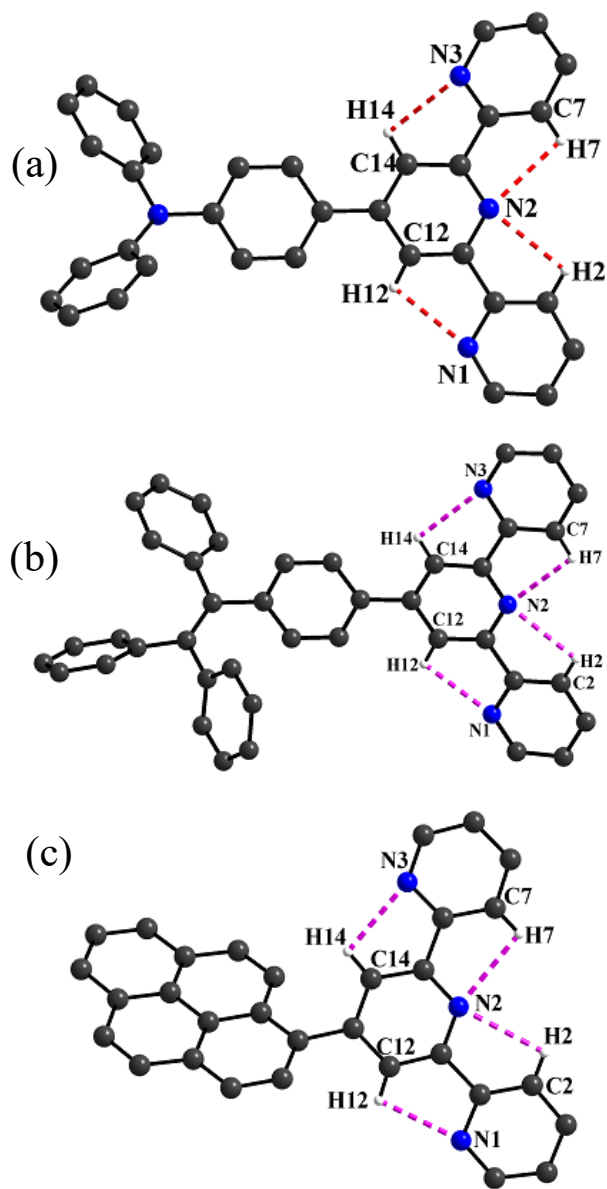

**Fig. S15C**-H...N intramolecular hydrogen bonding interactions in (a) TPA-TP (b) TPE-TP and (c) Py-TP

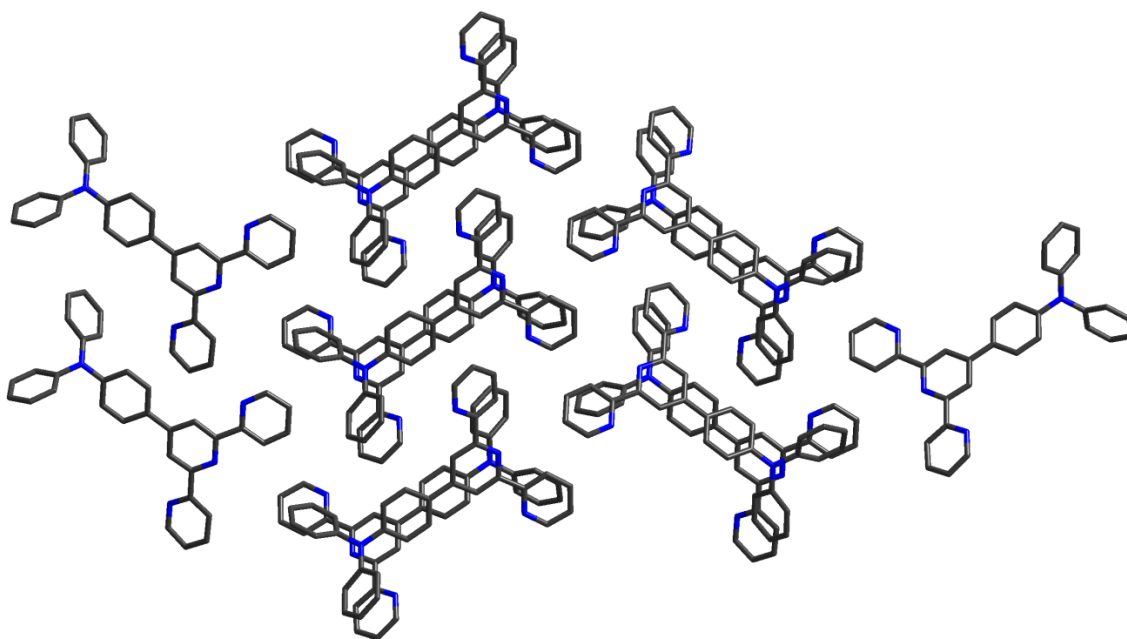

**Fig. S16** Molecular packing of TPA-TP in crystal lattice.

### 7. DSC studies

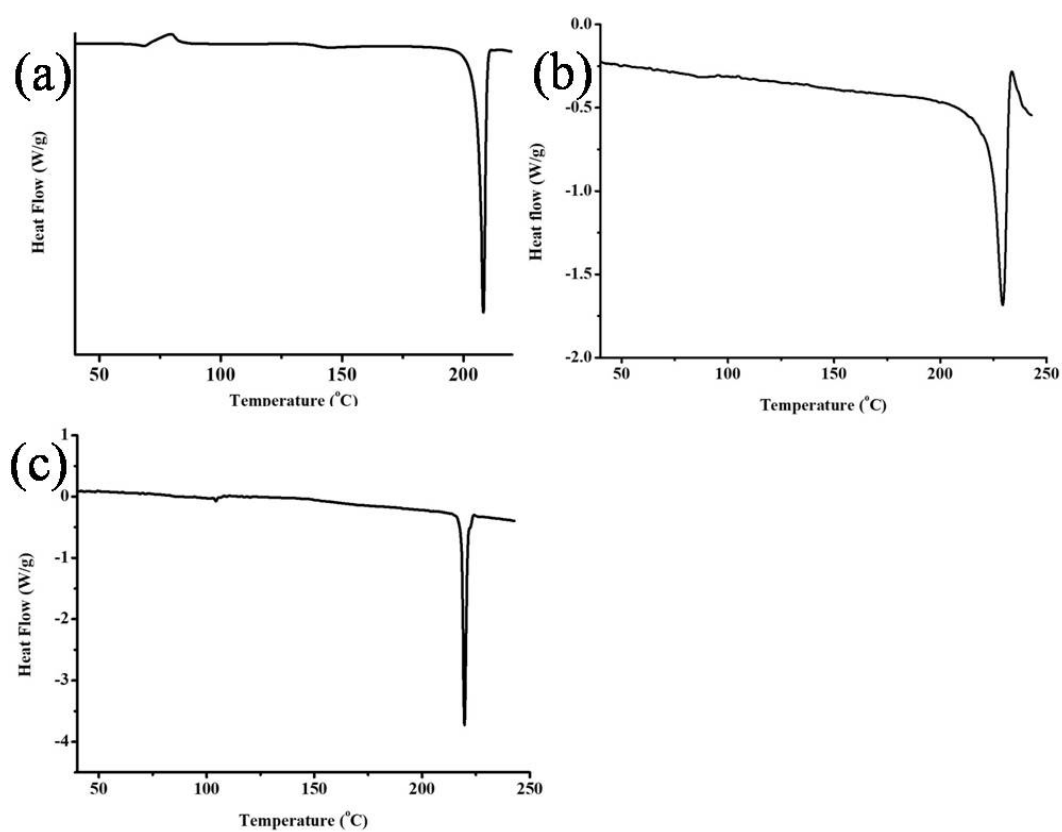

**Fig. S17.** DSC of (a) TPA-TP, (b) TPE-TP and (c) Py-TP.

## 7. Fluorescence sensing studies of nitroaromatics

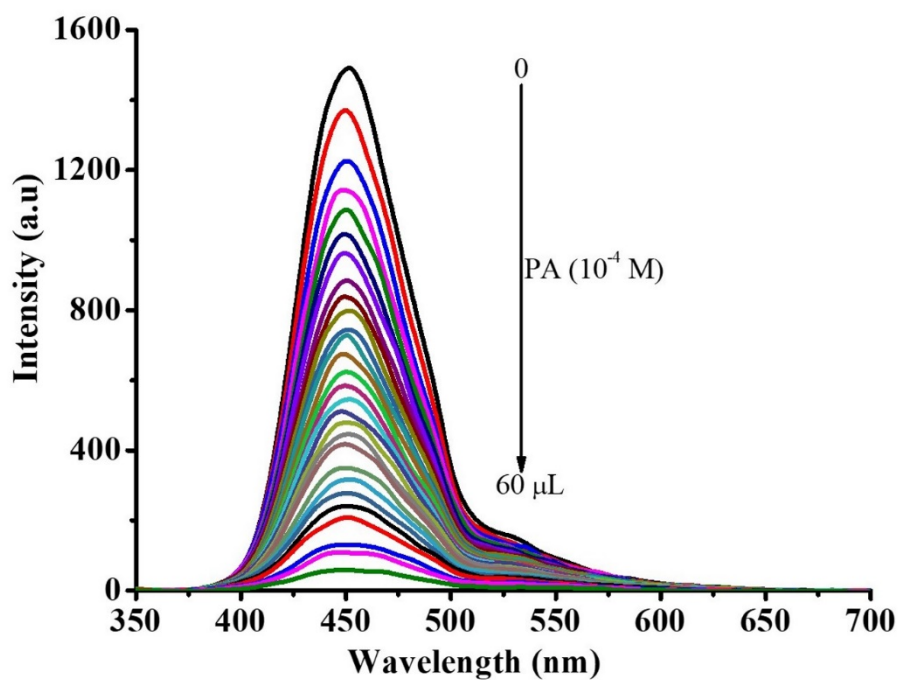

Fig. S18 Concentration dependent fluorescence quenching of TPA-TP by PA.  $\lambda_{\text{exc}} = 350$  nm.

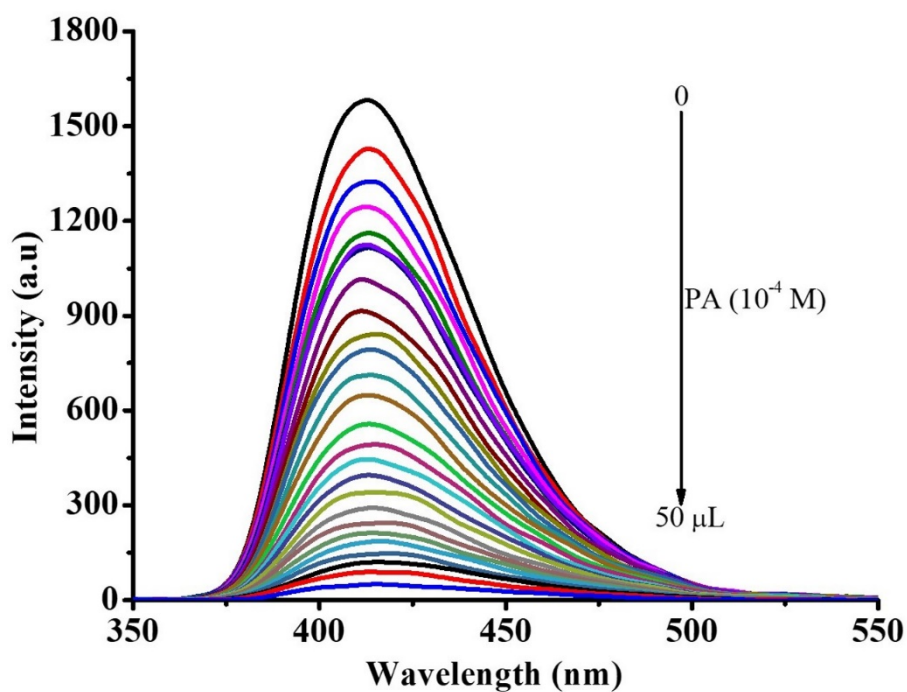

Fig. S19 Concentration dependent fluorescence quenching of Py-TP by PA.  $\lambda_{\text{exc}} = 350$  nm.

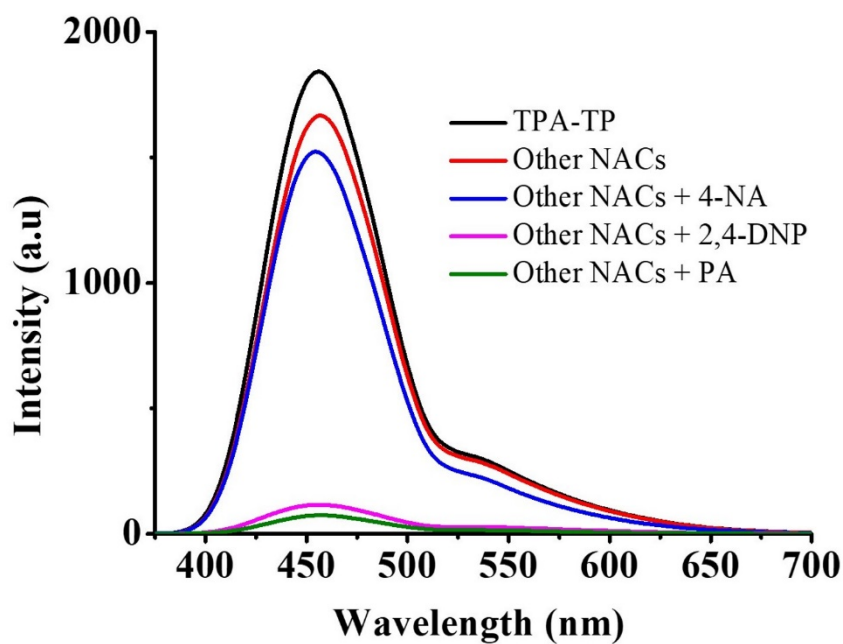

**Fig. S20** Interference studies of TPA-TP probe PA fluorescence sensing in presence of other NACs.  $\lambda_{\text{exc}} = 350$  nm.

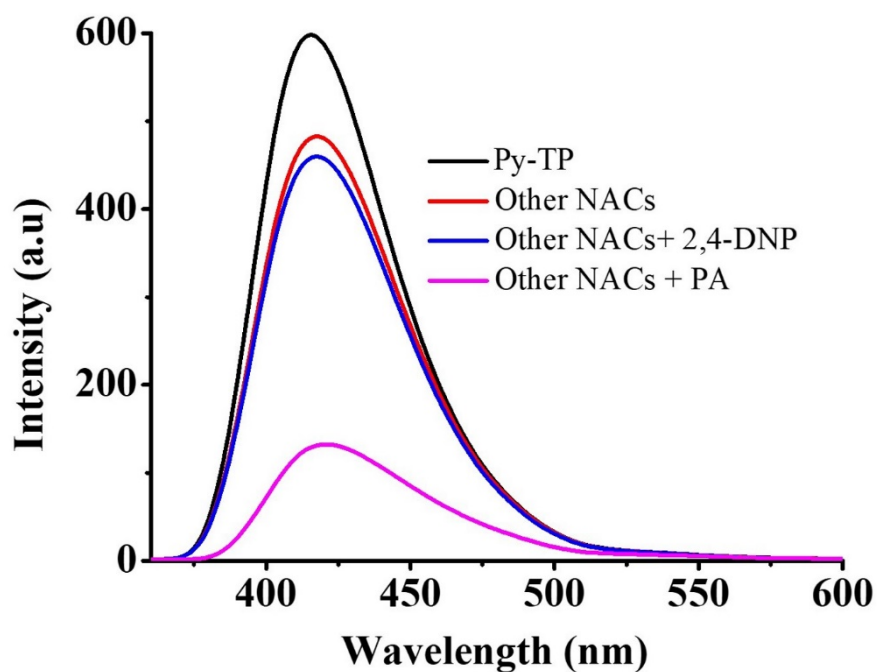

**Fig. S21** Interference studies of Py-TP probe PA fluorescence sensing in presence of other NACs.  $\lambda_{\text{exc}} = 350$  nm.

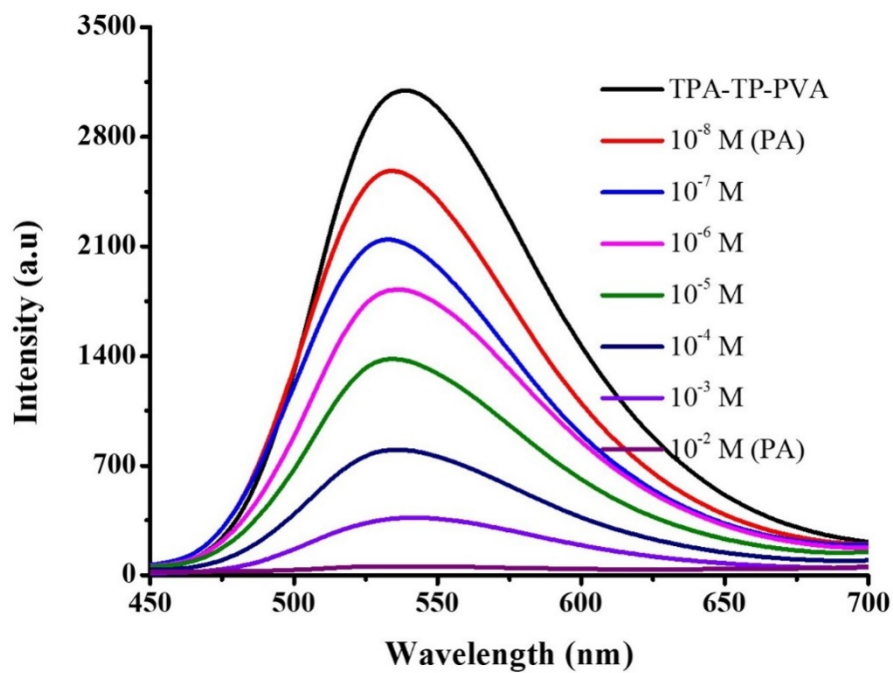

**Fig. S22** Fluorescence quenching of TPA-TP-PVA upon into different concentration of PA.  $\lambda_{\text{exc}} = 350$  nm.

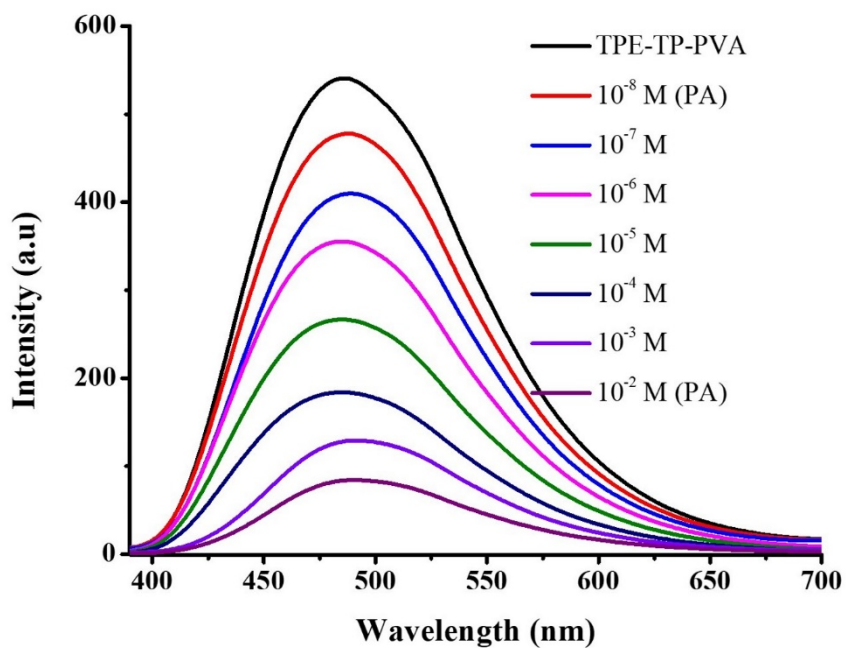

**Fig. S23** Fluorescence quenching of TPE-TP-PVA upon into different concentration of PA.  $\lambda_{\text{exc}} = 350$  nm.



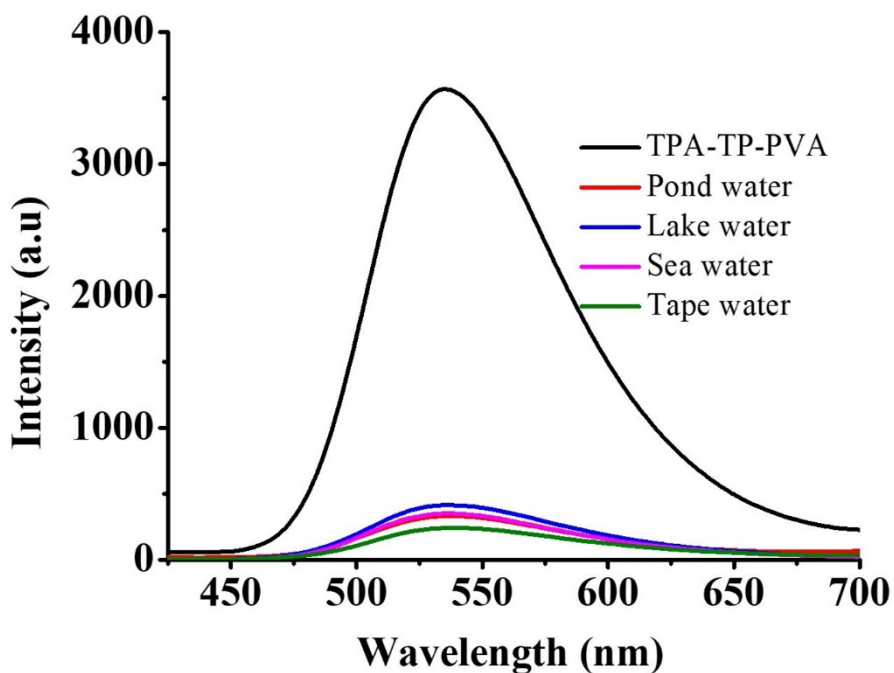

**Fig. S24** Fluorescence sensing of PA dissolved in real water samples using TPA-TP-PVA thin films.  $\lambda_{exc} = 350$  nm.

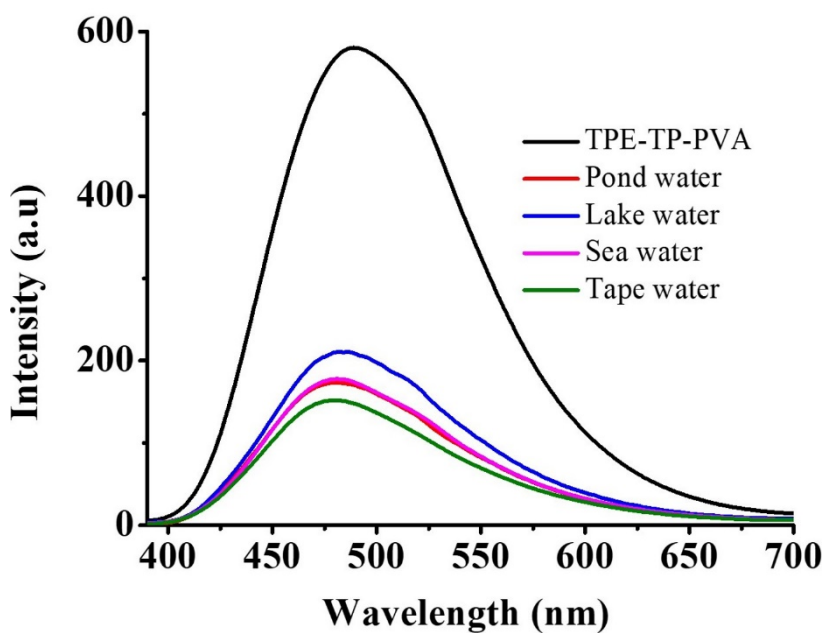

**Fig. S25** Fluorescence sensing of PA dissolved in real water samples using TPE-TP-PVA thin films.  $\lambda_{exc} = 350$  nm.

**Table S8.**TPA-TP-PVA thin film sensing of PA in real water samples with known concentration.

| Sample      | Spiked (M) | Detected (M)          | Recovery (%) |
|-------------|------------|-----------------------|--------------|
| Sea water   | $10^{-3}$  | $0.94 \times 10^{-3}$ | 94%          |
|             | $10^{-6}$  | $0.97 \times 10^{-6}$ | 97%          |
| River water | $10^{-3}$  | $0.98 \times 10^{-3}$ | 98%          |
|             | $10^{-6}$  | $0.96 \times 10^{-6}$ | 96%          |
| Pond water  | $10^{-4}$  | $0.99 \times 10^{-4}$ | 99%          |
|             | $10^{-7}$  | $0.97 \times 10^{-7}$ | 97%          |
| Lake water  | $10^{-4}$  | $0.96 \times 10^{-4}$ | 96%          |
|             | $10^{-7}$  | $0.98 \times 10^{-7}$ | 98%          |

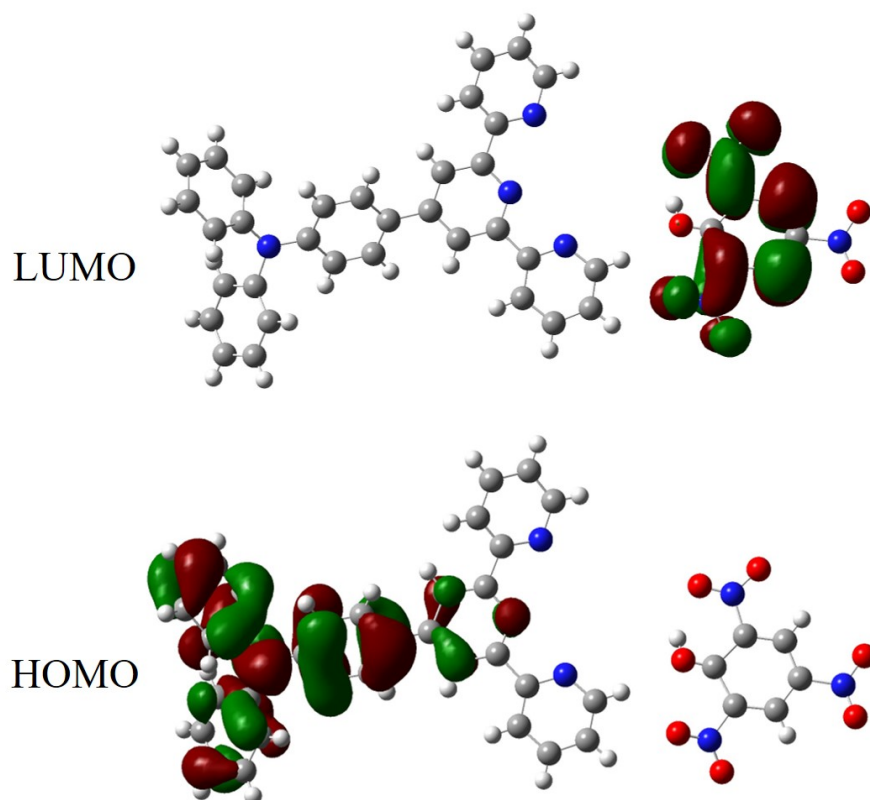

**Fig. S26** HOMO-LUMO of TPA-TP-PA.
